# Supplementary material for: A novel mechanism of memory loss in Alzheimer’s disease mice via the degeneration of entorhinal–CA1 synapses
Source: PubMed Central journal article supplement — Mol Psychiatry. 2016 Sep 27;23(2):199–210. doi: 10.1038/mp.2016.151 (PMC5794875; doi:10.1038/mp.2016.151), 2016-09-27
Supplement: mp2016151x1.pdf [file mp2016151x1.pdf]

## Supplementary Figure S1

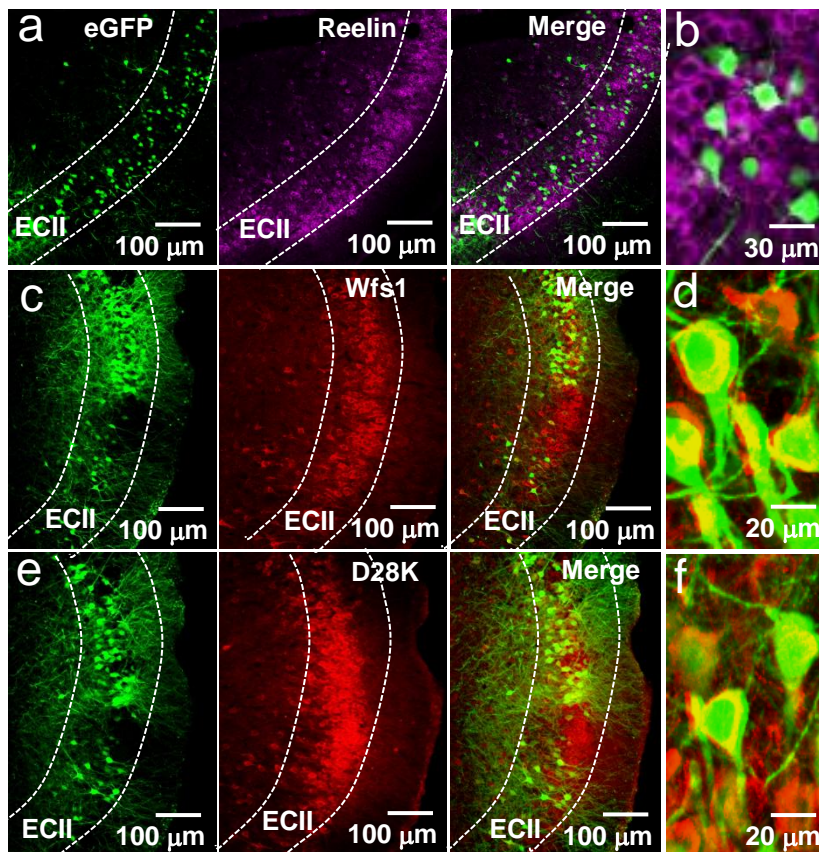

**Supplementary Figure S1.** ECII<sub>PN</sub> cells are negative to anti-body against reelin, but positive to wfs1 and D28K proteins. (a) Representative images show the eGFP-positive ECII<sub>PN</sub> (green) in a brain section of the PV<sup>TVA/G+/+</sup> mice injected with the ΔG-rabies-eGFP virus particles into the CA1 region of the hippocampus. The sections were stained with antibody against reelin (pink). (b) High magnification shows that ECII<sub>PN</sub> cells are negative to anti-reelin antibody. Similar results were seen in each of the four experiments. (c) Representative images show the eGFP-positive ECII<sub>PN</sub> (green) in a brain section that was labeled with antibody against wfs1 (red). (d) High magnification shows that ECII<sub>PN</sub> cells are positive to anti-wfs1 antibody. Similar results were seen in each of the four experiments. (e) Representative images show the eGFP-positive ECII<sub>PN</sub> (green) in a brain section that was labeled with antibody against D28K (red). (f) High magnification shows that ECII<sub>PN</sub> cells are positive to anti-D28K antibody. Similar results were seen in each of the four experiments.
