# Supplementary material for: A novel mechanism of memory loss in Alzheimer’s disease mice via the degeneration of entorhinal–CA1 synapses
Source: PubMed Central journal article supplement — Mol Psychiatry. 2016 Sep 27;23(2):199–210. doi: 10.1038/mp.2016.151 (PMC5794875; doi:10.1038/mp.2016.151), 2016-09-27
Supplement: mp2016151x2.pdf [file mp2016151x2.pdf]

Supplementary Figure S2

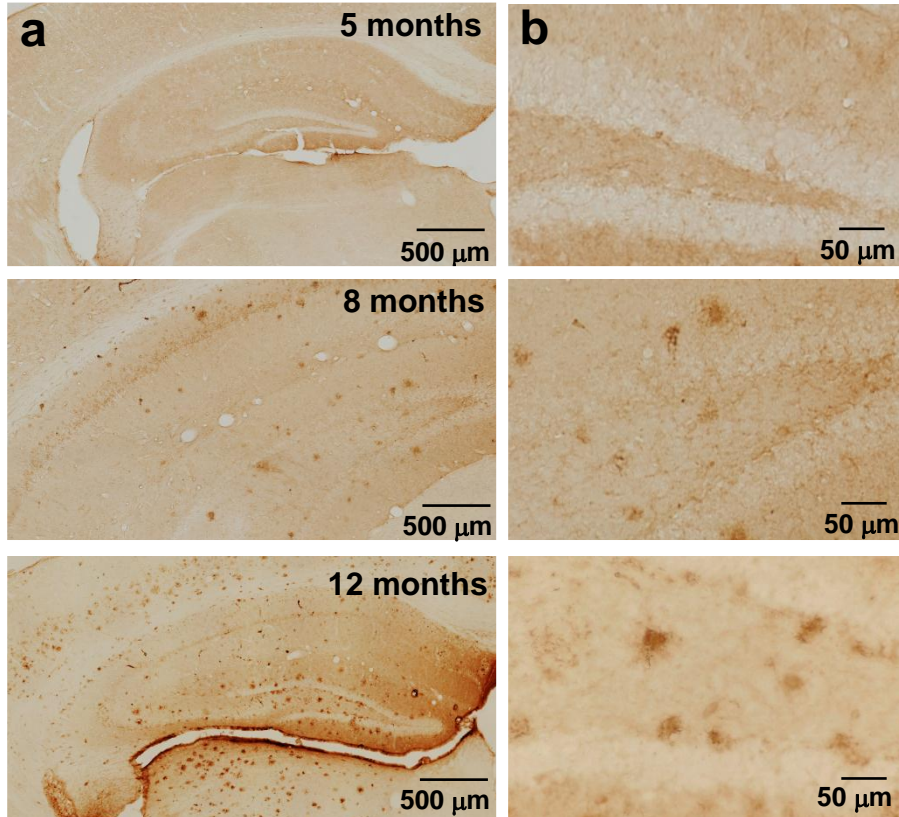

**Figure S2.** Plaque distribution in the brain of AD mice. (a) Staining for A $\beta$  with the 4G8 antibody revealed an age-dependent increase in A $\beta$  deposition in the brain particularly in the hippocampus. (b) High magnification shows the plaques in the dentate gyrus area. Numbers of mice analyzed: at 5 months, n = 6; at 8 months, n = 5; and at 12 months, n = 3.
