# Supplementary material for: A novel mechanism of memory loss in Alzheimer’s disease mice via the degeneration of entorhinal–CA1 synapses
Source: PubMed Central journal article supplement — Mol Psychiatry. 2016 Sep 27;23(2):199–210. doi: 10.1038/mp.2016.151 (PMC5794875; doi:10.1038/mp.2016.151), 2016-09-27
Supplement: mp2016151x3.pdf [file mp2016151x3.pdf]

Supplementary Figure S3

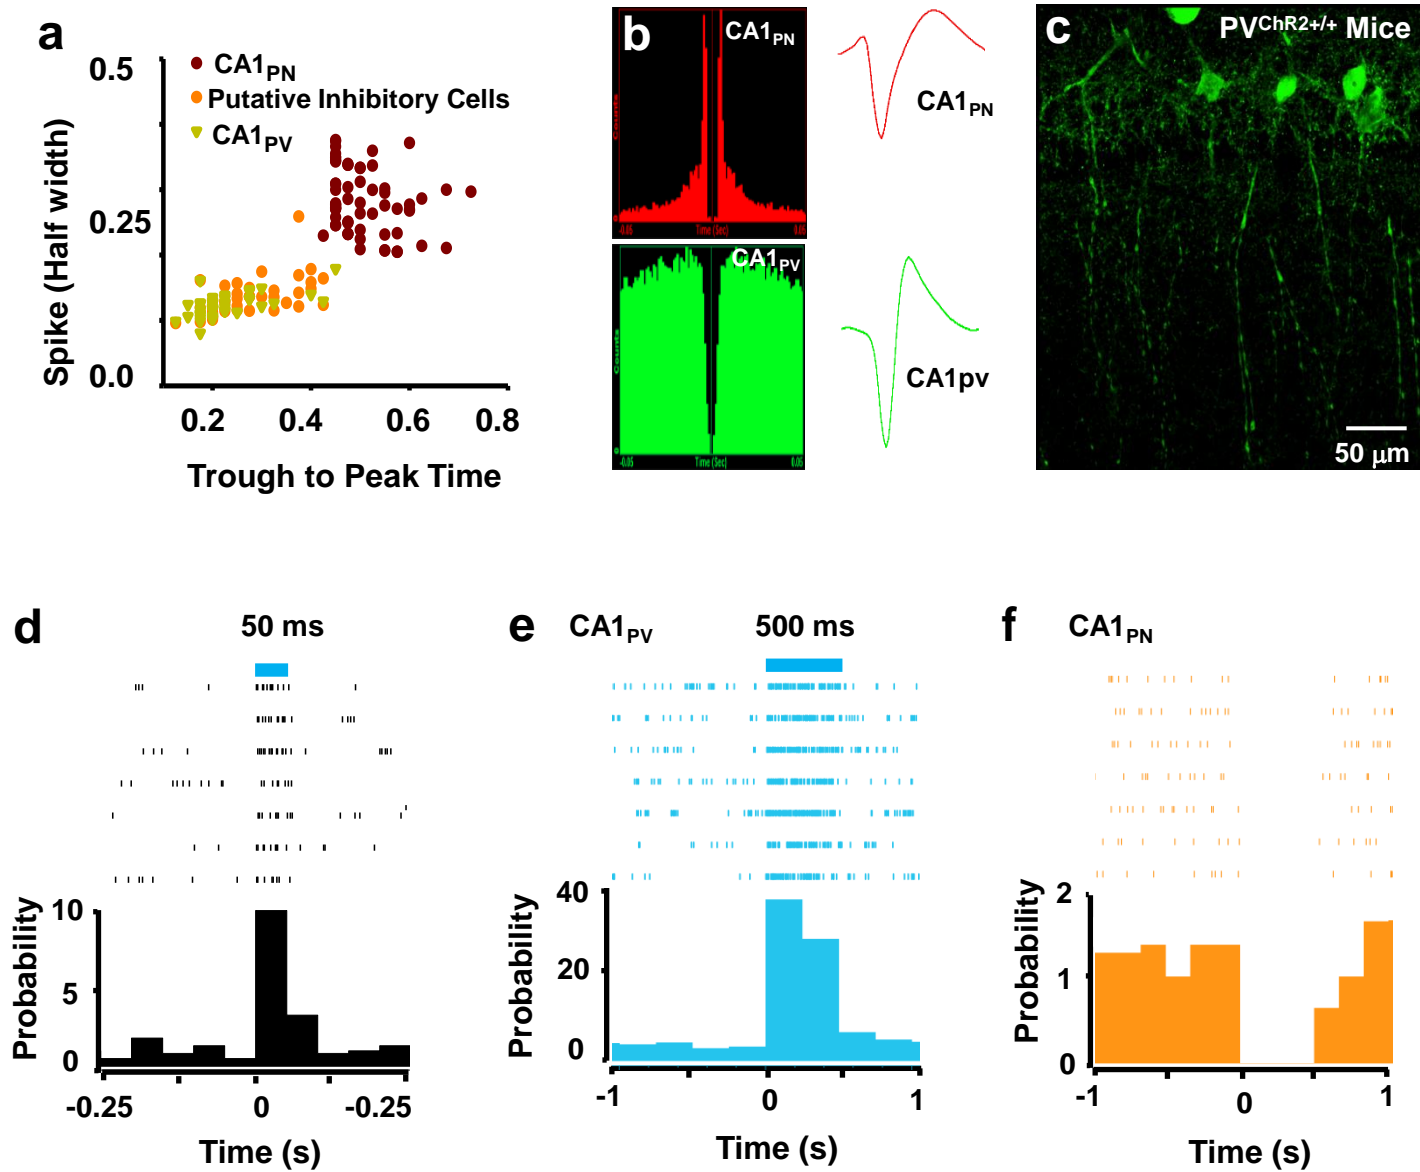

**Figure S3.** Recordings of action potential firings in CA1<sub>PV</sub> versus CA1<sub>PN</sub> in freely moving mice. **(a)** Action potential firings in the CA1 hippocampus of freely moving male PV<sup>ChR2+/+</sup> mice at 120 $\pm$ 2 days old of age are classified into three groups; CA1<sub>PN</sub>, CA1 putative inhibitory cells based on waveform properties, CA1<sub>PV</sub> units were isolated by blue laser lights. **(b)** Representative wave forms and traces are classified as the recordings from CA1<sub>PN</sub> (red) and CA1<sub>PV</sub> (green) of freely moving male PV<sup>ChR2+/+</sup> mice at 120 $\pm$ 2 days old of age. **(c)** A representative image shows the expression of ChR2-eGFP in PV cells of a C57Bl/6 mouse (PV<sup>ChR2+/+</sup> mouse). **(d)** CA1<sub>PV</sub> in freely moving PV<sup>ChR2+/+</sup> mice at 120 days old of age were reliably activated by a 50 ms blue laser light (blue bar). **(e and f)** Sustained activation of CA1<sub>PV</sub> **(e)** by delivery of 500 ms blue laser lights (blue bar) inhibits the nearby CA1<sub>PN</sub> **(f)** firings in freely moving PV<sup>ChR2+/+</sup> mice. The similar results were seen in each of six mice. Note: in this study, we generated transgenic mice (CA1<sub>PV</sub><sup>ChR2+/+</sup> mice) expressing ChR2-eGFP in PV neurons by crossing the ChR2<sup>loxP/loxP</sup> mice with the male PV-Cre mice at 120  $\pm$  2 days of age. The male PV-Cre mice 120  $\pm$  2 days of age were used for breeding because during that period of time they show a high rate of success in mating with the female ChR2<sup>loxP/loxP</sup> mice.
