# Supplementary material for: A novel mechanism of memory loss in Alzheimer’s disease mice via the degeneration of entorhinal–CA1 synapses
Source: PubMed Central journal article supplement — Mol Psychiatry. 2016 Sep 27;23(2):199–210. doi: 10.1038/mp.2016.151 (PMC5794875; doi:10.1038/mp.2016.151), 2016-09-27
Supplement: mp2016151x4.pdf [file mp2016151x4.pdf]

Supplementary Figure S4

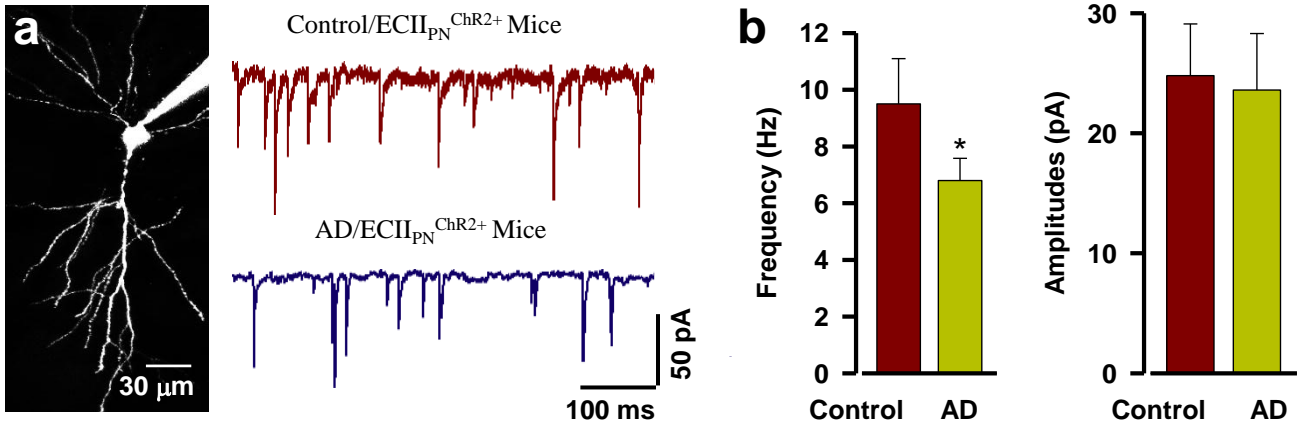

**Figure S4.** Reduction of inhibitory synaptic inputs onto CA1<sub>PN</sub> in AD mice. A representative (a) of CA1<sub>PN</sub> from AD/ECII<sub>PN</sub><sup>ChR2+</sup> mice and the miniature inhibitory postsynaptic currents (IPSCs) in CA1<sub>PN</sub> from control/ECII<sub>PN</sub><sup>ChR2+</sup> and AD/ECII<sub>PN</sub><sup>ChR2+</sup> mice at 180 days old of age. Bar graphs (b) show the averaged frequency and the mean amplitude of the miniature IPSCs. Data are mean ± SEM (n = 12 recordings/6 mice/group, \**p* < 0.001, *t*-tests).
