# Supplementary material for: A novel mechanism of memory loss in Alzheimer’s disease mice via the degeneration of entorhinal–CA1 synapses
Source: PubMed Central journal article supplement — Mol Psychiatry. 2016 Sep 27;23(2):199–210. doi: 10.1038/mp.2016.151 (PMC5794875; doi:10.1038/mp.2016.151), 2016-09-27
Supplement: mp2016151x5.pdf [file mp2016151x5.pdf]

Supplementary Figure S5

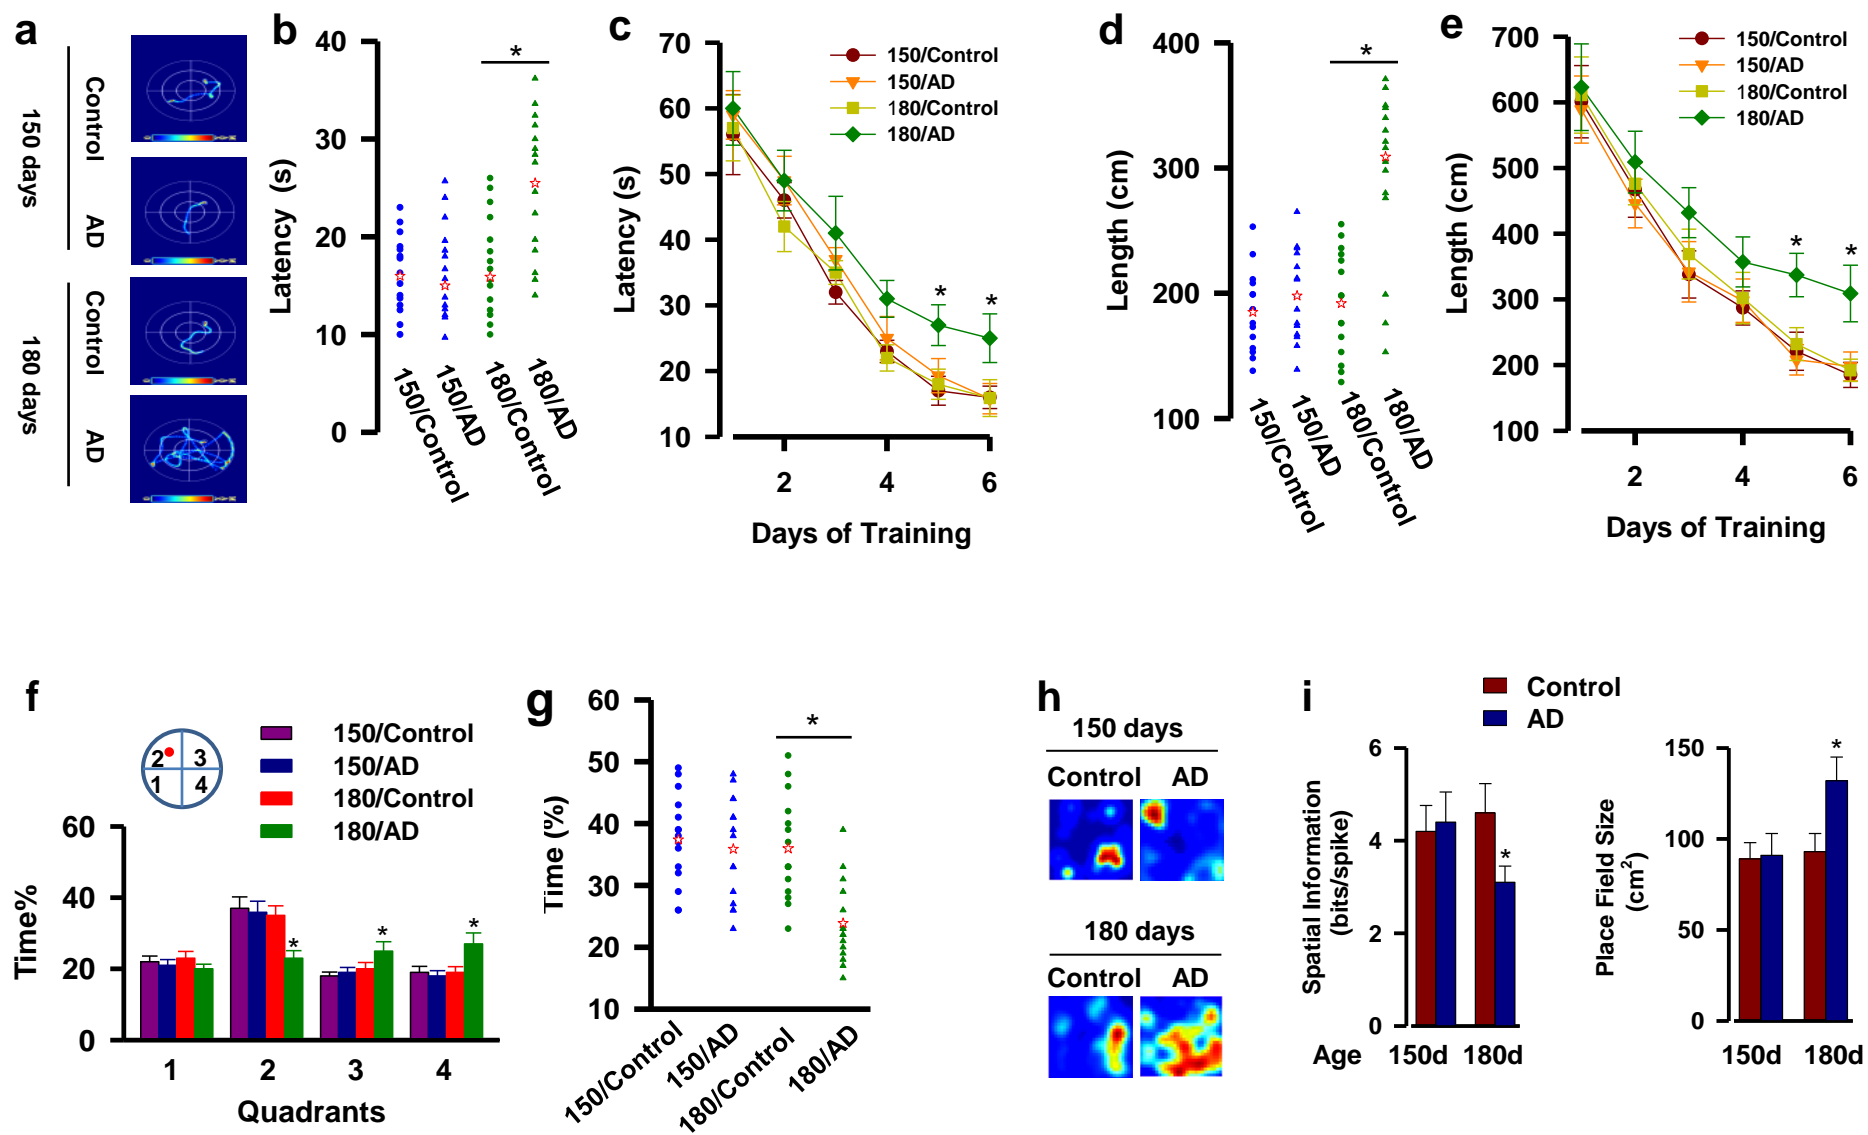

**Figure S5.** Impairments of spatial learning and memory in AD mice. **(a and b)** Representative path tracings **(a)** and a plot **(b)** of the latencies for individual control/ECII<sub>PN</sub><sup>ChR2+</sup> (control) and AD/ECII<sub>PN</sub><sup>ChR2+</sup> (AD) mice at the training tests of day 6 to reach a hidden platform (n = 15 mice per group,  $p < 0.001$ , *t*-tests). **(c)** A plot of the averaged latencies throughout the training tests to reach a hidden platform. Data are mean  $\pm$  SEM (n = 15 mice per group,  $F_{(3,51)} = 6.73$ ,  $p < 0.001$ , two-ways ANOVA). **(d)** A plot of the swim length for individual control/ECII<sub>PN</sub><sup>ChR2+</sup> (control) and AD/ECII<sub>PN</sub><sup>ChR2+</sup> (AD) mice at the training tests of day 6 to reach a hidden platform (n = 15 mice per group,  $p < 0.001$ , *t*-tests). **(e)** A plot of the averaged swim length throughout the training tests to reach a hidden platform. Data are mean  $\pm$  SEM (n = 15 mice per group,  $F_{(3,51)} = 6.73$ ,  $p < 0.001$ , two-ways ANOVA). **(f)** A bar graph shows the averaged percentage of time spent in searching of a hidden platform in each quadrant during the probe trial. Data are mean  $\pm$  SEM (n = 15 mice per group,  $F_{(3,51)} = 5.87$ ,  $p < 0.001$ , two-ways ANOVA). **(g)** A plot of the percentage of time spent for individual control/ECII<sub>PN</sub><sup>ChR2+</sup> (control) and AD/ECII<sub>PN</sub><sup>ChR2+</sup> (AD) mice in searching of a hidden platform in a targeting quadrant during the probe trial (n = 15 mice per group,  $p < 0.001$ , *t*-tests). **(h and i)** Impaired spatial representations of CA1<sub>PN</sub> in AD/ECII<sub>PN</sub><sup>ChR2+</sup> (AD) mice. Representative rate maps **(h)** of CA1<sub>PN</sub> in freely moving control/ECII<sub>PN</sub><sup>ChR2+</sup> (control) and AD/ECII<sub>PN</sub><sup>ChR2+</sup> (AD) mice. Dark red corresponds to the maximum firing rate and dark blue to no firing. Bar graphs **(i)** show the information density expressed as bits/spike and place field size. Data are mean  $\pm$  SEM (n = 11 mice per group;  $F_{(3,41)} = 3.36$ ,  $p < 0.01$ , two-ways ANOVA).
