# Supplementary material for: A novel mechanism of memory loss in Alzheimer’s disease mice via the degeneration of entorhinal–CA1 synapses
Source: PubMed Central journal article supplement — Mol Psychiatry. 2016 Sep 27;23(2):199–210. doi: 10.1038/mp.2016.151 (PMC5794875; doi:10.1038/mp.2016.151), 2016-09-27
Supplement: mp2016151x6.pdf [file mp2016151x6.pdf]

Supplementary Figure S6

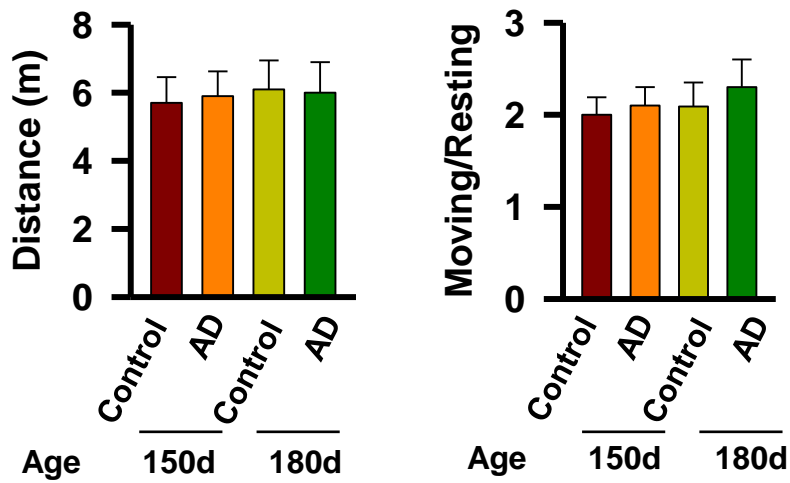

**Figure S6.** Locomotor activity is normal in AD mice. Bar graphs show walking distances and moving versus resting ratios of AD/ $ECII_{PN}^{ChR2+}$  (AD) and control/ $ECII_{PN}^{ChR2+}$  (Control) mice in the open field tests. Data are mean  $\pm$  SEM (n = 9 mice per group).
