# Supplementary material for: A novel mechanism of memory loss in Alzheimer’s disease mice via the degeneration of entorhinal–CA1 synapses
Source: PubMed Central journal article supplement — Mol Psychiatry. 2016 Sep 27;23(2):199–210. doi: 10.1038/mp.2016.151 (PMC5794875; doi:10.1038/mp.2016.151), 2016-09-27
Supplement: mp2016151x7.pdf [file mp2016151x7.pdf]

Supplementary Figure S7

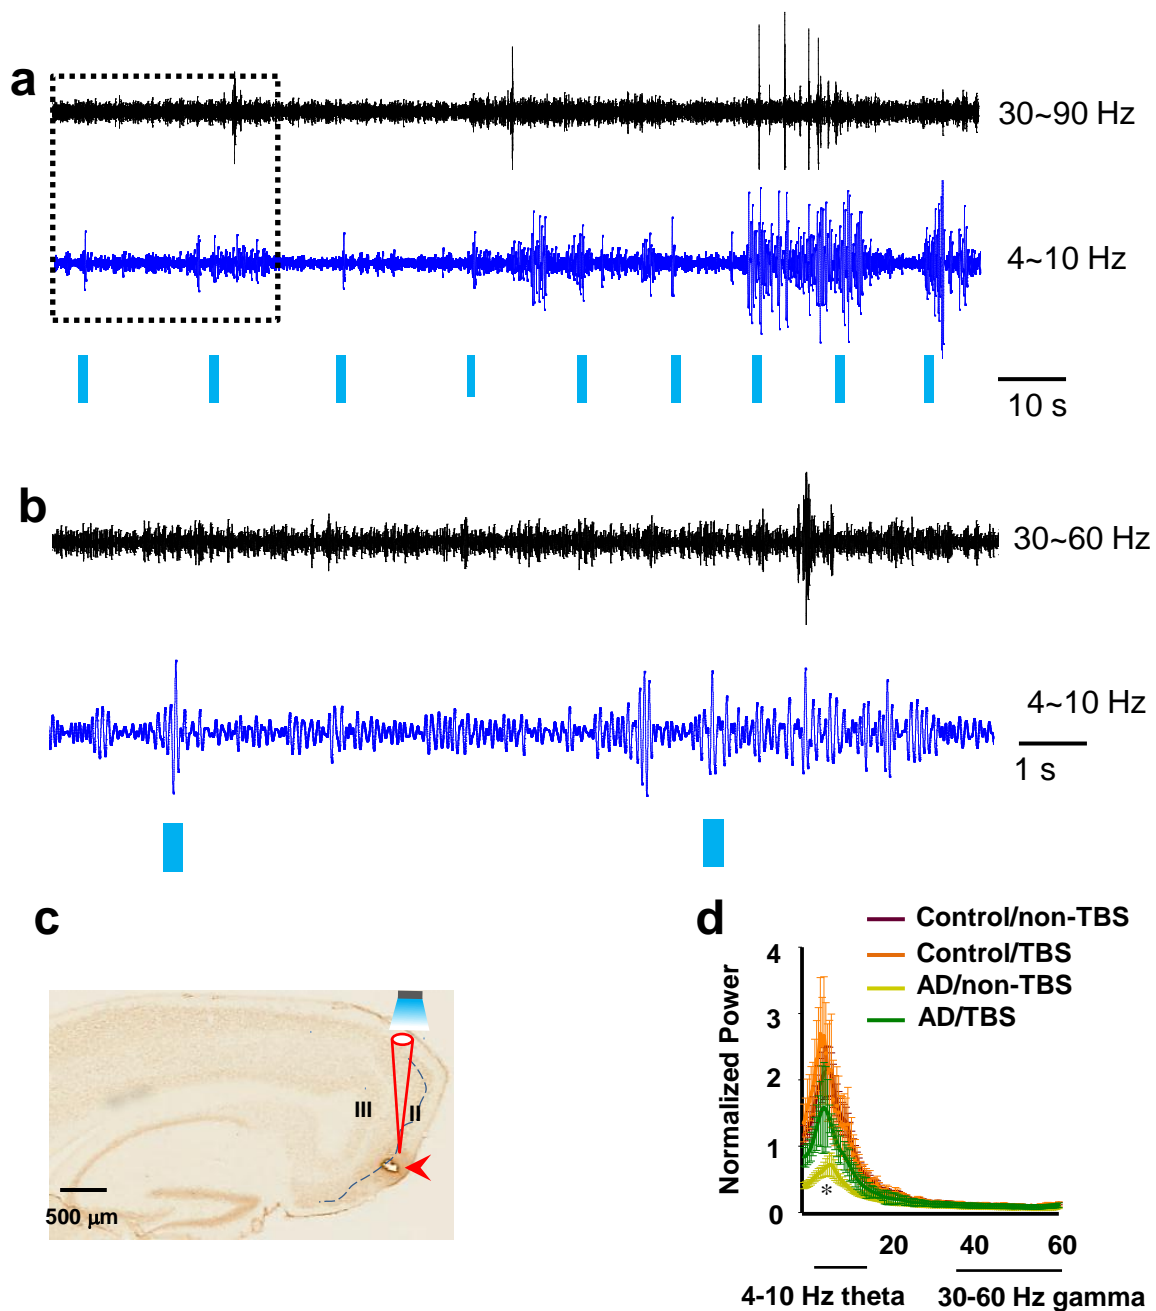

**Figure S7.** Application of TBS enhances theta oscillation in CA1 neurons. (a) TBS generates and enhances theta oscillation. Representative recordings of LFP (top, black) and theta waves (bottom, blue) in the CA1 hippocampus in response to blue light illuminations (blue bars) of ECII<sub>PN</sub> in AD mice at 120 days old of age. (b) Representative recordings show the boxed fragments in a. (c) Arrow head in a brain section stained with NeuN protein marks electrolytic lesion location, showing the fiber located in ECII region. (d) Power spectral densities of theta and gamma oscillations from AD/ECII<sub>PN</sub><sup>ChR2+</sup> (AD) and control/ECII<sub>PN</sub><sup>ChR2+</sup> (control) mice with (TBS) or without (non-TBS) TBS treatment. Data are mean ± SEM (n = 9 mice/group, \**p* < 0.001, Student *t*-tests).
