# Supplementary material for: A novel mechanism of memory loss in Alzheimer’s disease mice via the degeneration of entorhinal–CA1 synapses
Source: PubMed Central journal article supplement — Mol Psychiatry. 2016 Sep 27;23(2):199–210. doi: 10.1038/mp.2016.151 (PMC5794875; doi:10.1038/mp.2016.151), 2016-09-27
Supplement: mp2016151x8.pdf [file mp2016151x8.pdf]

## Supplementary Figure S8

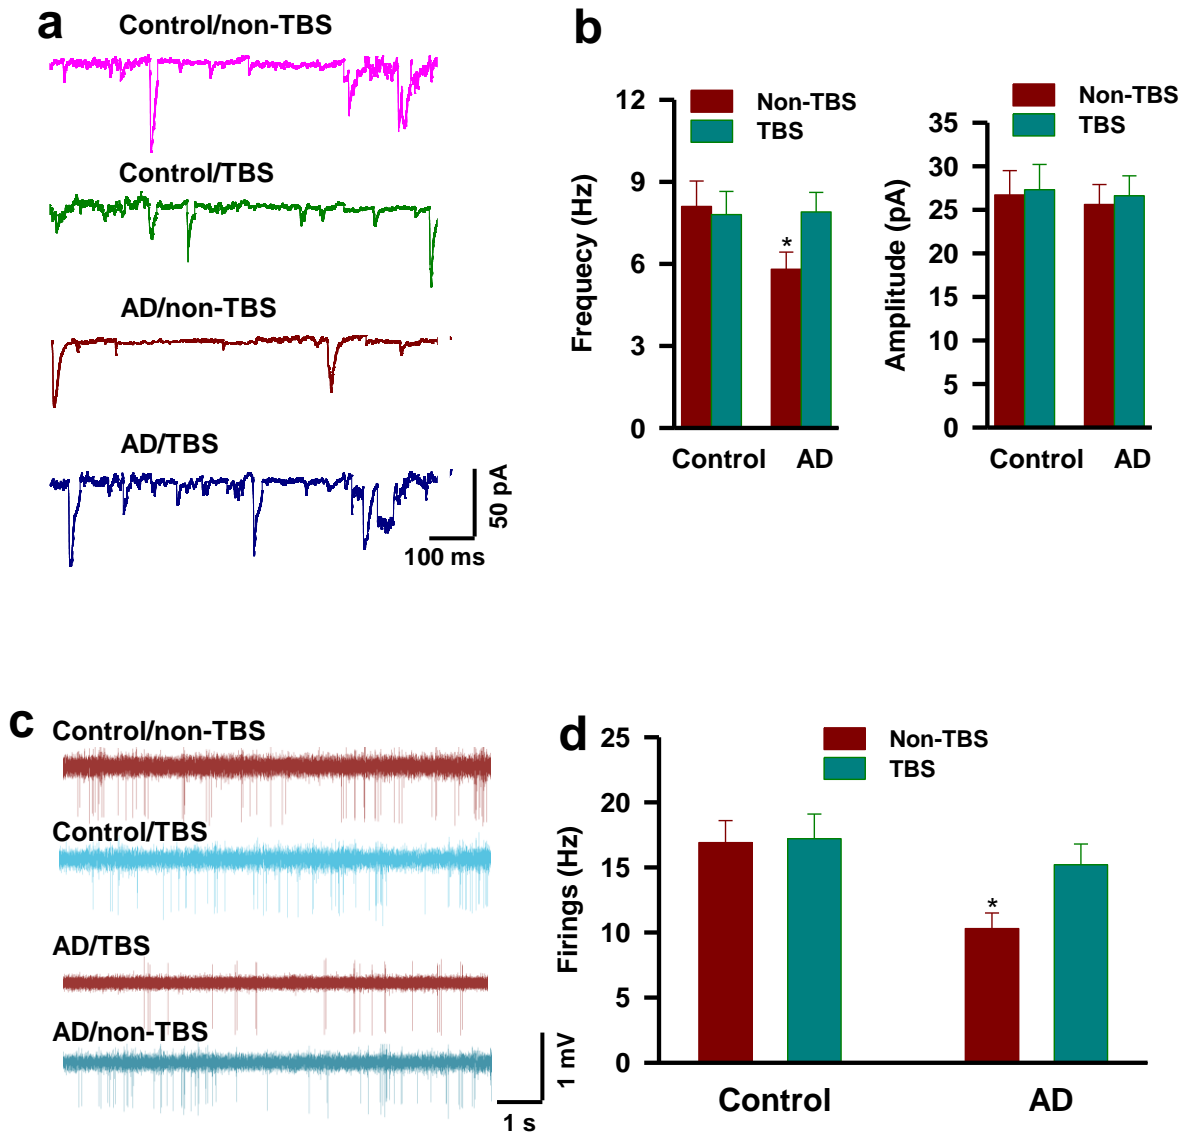

**Figure S8.** Application of TBS prevents a reduction of GABA release from CA1<sub>PV</sub> of AD mice. **(a and b)** A representative mIPSCs **(a)** in CA1<sub>PN</sub> from the AD/ECII<sub>PN</sub><sup>ChR2+</sup> (AD) and the control/ ECII<sub>PN</sub><sup>ChR2+</sup> mice (control) 25 days after control (non-TBS) or TBS treatment. The mean amplitudes and the frequencies of the events are summarized in bar graphs **(b)**. Data are mean  $\pm$  SEM (n = 27 recordings/9 mice/group). Application of TBS prevents a reduction of action potential firings in CA1<sub>PV</sub> of AD mice. **(c and d)** Representative recordings **(c)** and the averaged frequency **(d)** of action potential firings in CA1<sub>PV</sub> from AD/ECII<sub>PN</sub><sup>ChR2+</sup> mice (AD) and the age-matched control/ECII<sub>PN</sub><sup>ChR2+</sup> (control) mice 25 days after control (non-TBS) or TBS treatment. Data are mean  $\pm$  SEM (n = 11 mice/group,  $p < 0001$ ;  $t$ -tests).
