# Supplementary material for: A novel mechanism of memory loss in Alzheimer’s disease mice via the degeneration of entorhinal–CA1 synapses
Source: PubMed Central journal article supplement — Mol Psychiatry. 2016 Sep 27;23(2):199–210. doi: 10.1038/mp.2016.151 (PMC5794875; doi:10.1038/mp.2016.151), 2016-09-27
Supplement: mp2016151x9.pdf [file mp2016151x9.pdf]

## Supplementary Figure S9

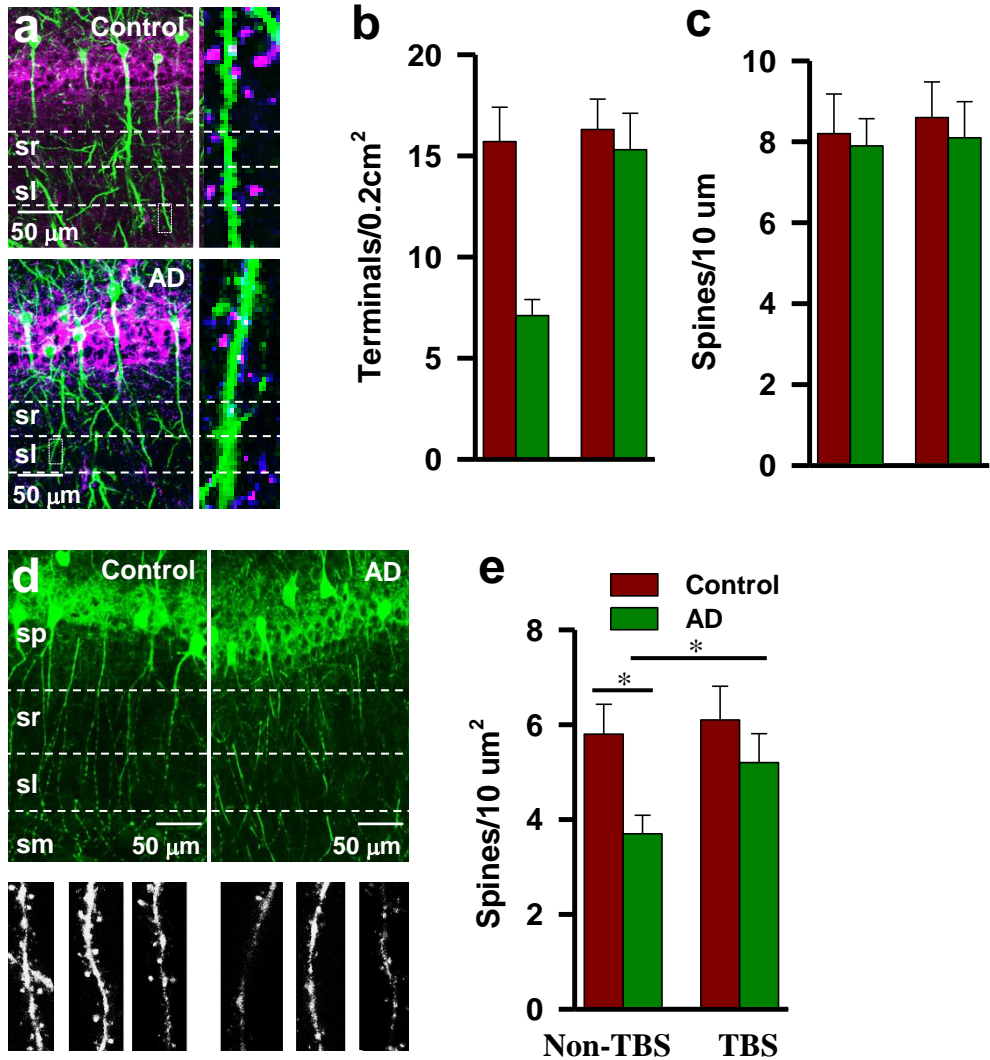

**Supplementary Figure S9.** TBS treatment rescues a synaptic loss in CA1<sub>PV</sub> from AD mice. (a) Synaptophysin (SYT)-labeled presynaptic terminals (pink) in the CA1 hippocampus from control and AD mice, in which eGFP was expressed in the CA1<sub>PN</sub> (green). (b, c) Presynaptic terminals (b) and postsynaptic spines (c) in the CA1<sub>PN</sub> were analyzed in the CA1 sl region from control and AD mice. The mice were treated with (AD/TBS) or without (AD/non-TBS). Data are mean ± SEM (n = 4 mice per group, \**p* < 0.001, *t*-tests). (d) Representative images of a CA1 hippocampus from control and AD mice that expressed eGFP in CA1<sub>PV</sub> cells. The mice were treated with (AD/TBS) or without (AD/non-TBS). Images show the spines in the PV dendritic branches in the CA1 sl region, a terminal projection zone of ECII<sub>PN</sub>. (e) Spine densities in the CA1<sub>PV</sub> of AD are reduced and rescued by TBS treatment. Data are mean ± SEM (n = 4 mice per group, \**p* < 0.001, *t*-tests). In this study, AD/ECII<sub>PN</sub><sup>Chr2+</sup> (AD mice) mice were crossed with the CaMK-IIα-Cre (a) or the PV-Cre (d) mice and stereotactically injected with 2 μl of a high titer of the lenti-eGFP<sup>loxP/loxP</sup> virus particles (3 × 10<sup>11</sup> genomic particles/ml) in the CA1 region, resulting in eGFP expression in the CA1<sub>PN</sub> or the CA1<sub>PV</sub> of AD/ECII<sub>PN</sub><sup>Chr2+</sup> mice. Presynaptic terminals and the dendritic branches (20 μm segment) from the CA1<sub>PN</sub> (50 segments per animal) and the CA1<sub>PV</sub> (50 segments per animal) in the sl region were studied. The averaged spine densities (spines per 10 μm<sup>2</sup> length of dendrites) was analyzed 25 days after 35-days TBS treatment.

so: stratum oriens; sp: stratum pyramidale; sr: stratum radiatum; sl: stratum lacunosum; sm: stratum moleculare.
