# Supplementary material for: A novel mechanism of memory loss in Alzheimer’s disease mice via the degeneration of entorhinal–CA1 synapses
Source: PubMed Central journal article supplement — Mol Psychiatry. 2016 Sep 27;23(2):199–210. doi: 10.1038/mp.2016.151 (PMC5794875; doi:10.1038/mp.2016.151), 2016-09-27
Supplement: mp2016151x10.pdf [file mp2016151x10.pdf]

Supplementary Figure S10

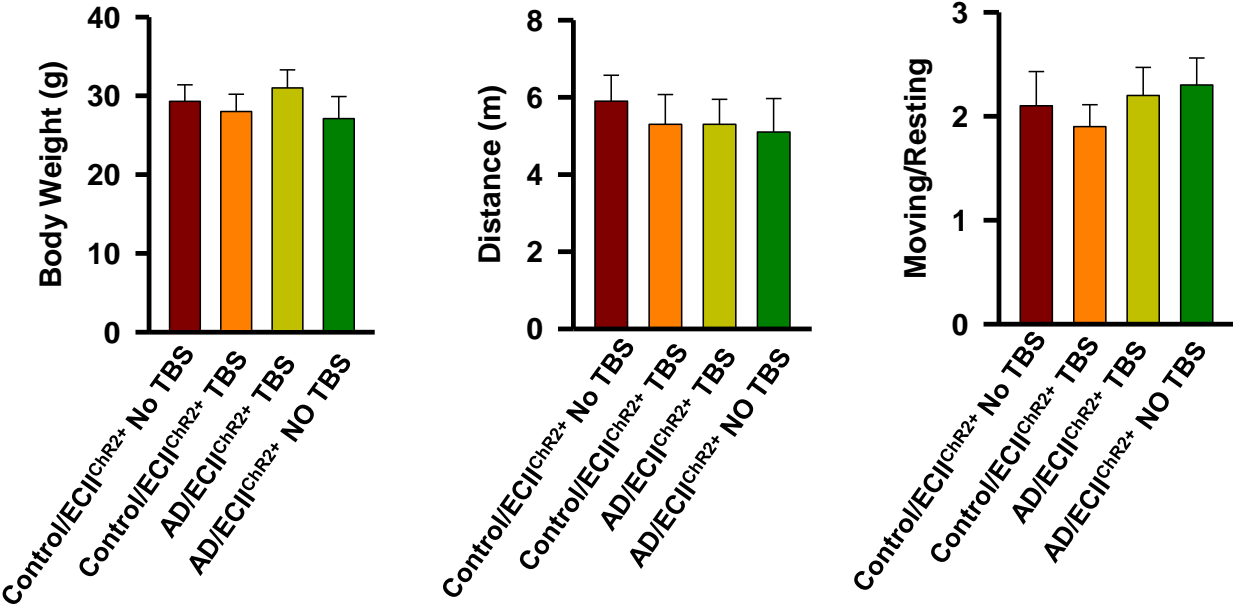

**Figure S10.** A bar graph shows that TBS treatment did not affect body weight, moving distance and the ratio of moving versus resting in the open field tests. Data are mean  $\pm$  SEM (n = 11 mice per group).
